# Supplementary material for: Inhibition of NLRP3 inflammasome in tumor microenvironment leads to suppression of metastatic potential of cancer cells
Source: Sci Rep. 2019 Aug 22;9:12277. doi: 10.1038/s41598-019-48794-x (PMC6706417; doi:10.1038/s41598-019-48794-x)

## Supplementary information

### **Inhibition of NLRP3 inflammasome in tumor microenvironment leads to suppression of metastatic potential of cancer cells**

Hye Eun Lee<sup>1,\*</sup>, Jin Young Lee<sup>1,\*</sup>, Gabsik Yang<sup>1</sup>, Han Chang Kang<sup>1</sup>, Yong-Yeon Cho<sup>1</sup>, and Hye Suk Lee<sup>1</sup>,  
and Joo Young Lee<sup>1‡</sup>

<sup>1</sup>BK21 PLUS Team, College of Pharmacy, The Catholic University of Korea, Bucheon, Republic of Korea, 14662

<sup>‡</sup>Corresponding author: Joo Young Lee, College of Pharmacy, The Catholic University of Korea, Bucheon, Korea, 14662. Tel: 82-2-2164-4095. Fax: 82-2-2164-4059. E-mail: [joolee@catholic.ac.kr](mailto:joolee@catholic.ac.kr).

\*, equally contributed.

Running title: Suppression of metastatic potential by NLRP3 inflammasome inhibition in macrophages

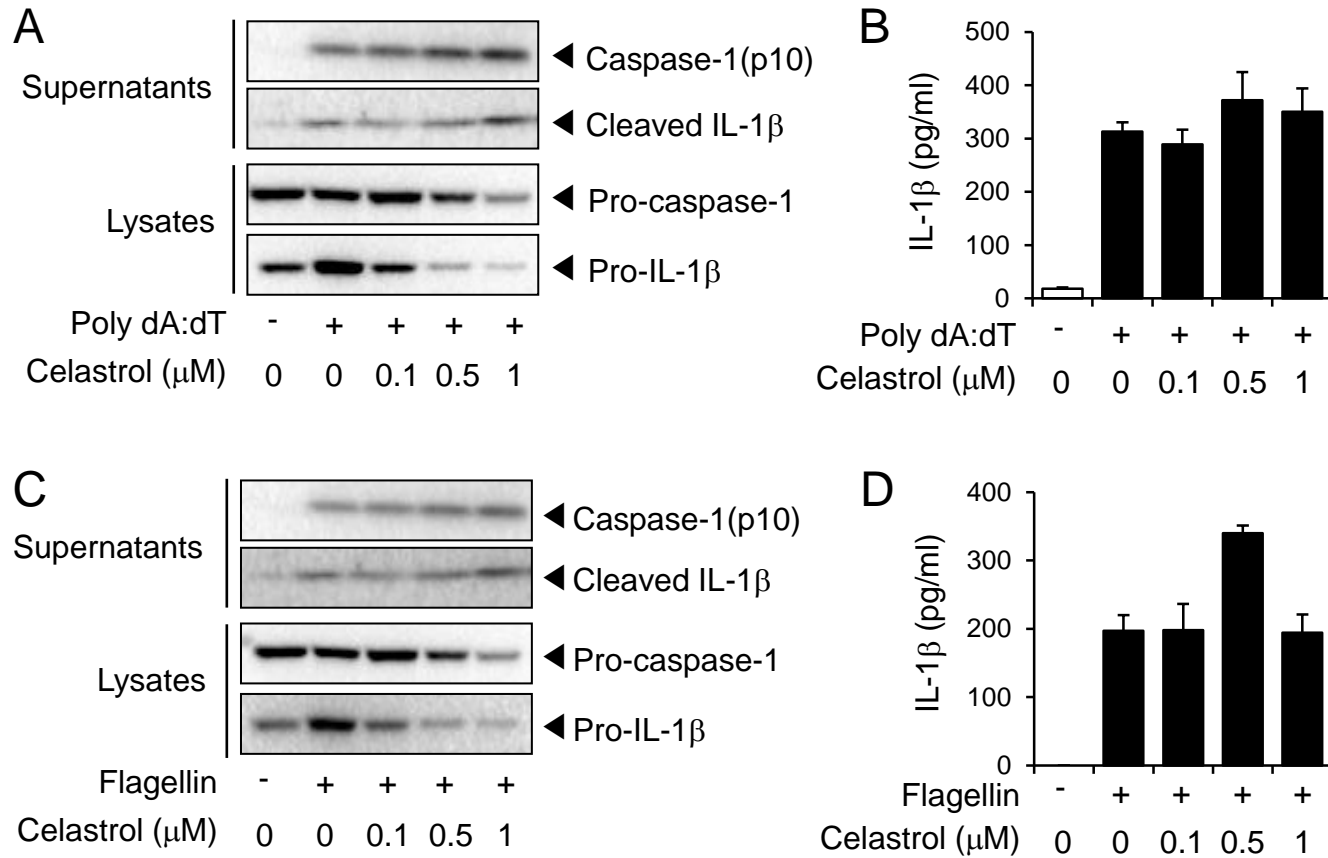

**Supplemental Figure 1. Celastrol does not suppress the activation of AIM2 and NLRC4 inflammasome in primary macrophages.** Bone marrow-derived macrophages were primed with LPS (500 ng/ml) for 4 hr. Then, the cells were treated with celastrol for 1 hr and further stimulated with (A, B) poly dA:dT (1  $\mu$ g) or (C, D) flagellin (10  $\mu$ g) for 6 hr. A, C. Cell culture supernatants and cell lysates were immunoblotted for pro-caspase-1, caspase-1(p10), pro-IL-1 $\beta$ , and IL-1 $\beta$ . B, D. Cell culture supernatants were analyzed for secreted IL-1 $\beta$  using ELISA. Values represent the means  $\pm$  SEM (n=3-5).

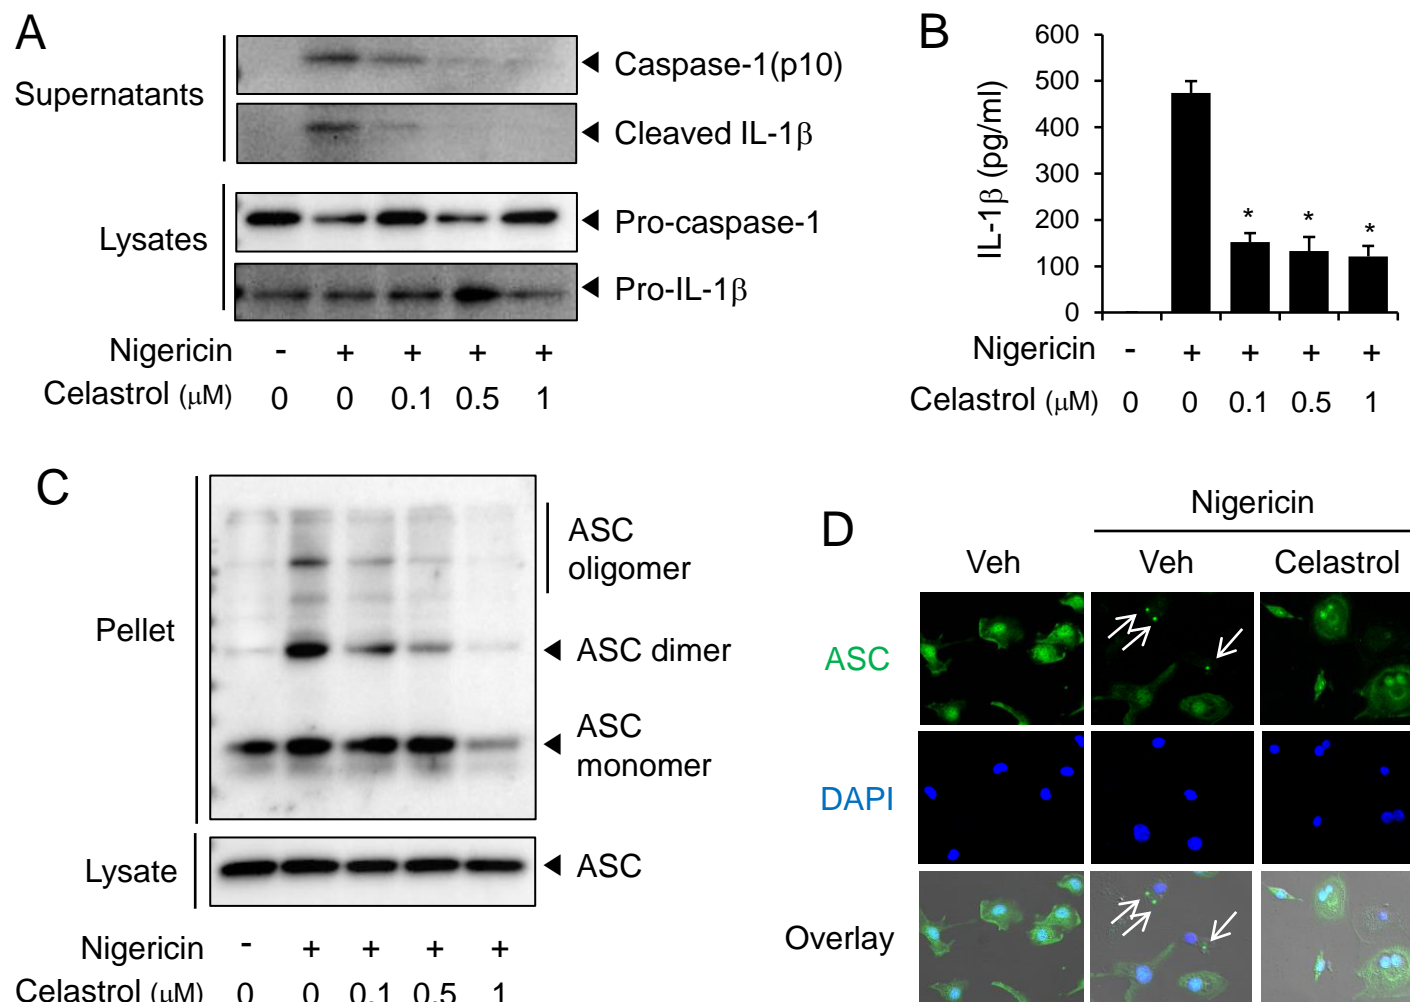

**Supplemental Figure 2. Celastrol suppresses NLRP3 inflammasome activation induced by nigericin in primary macrophages.** Bone marrow-derived macrophages were primed with LPS (100 ng/ml) for 4 hr. The cells were treated with celastrol for 1 hr and then stimulated with nigericin (10  $\mu\text{M}$ ) for (A) 1 hr or (B) 16 hr. (A) The cell culture supernatants and cell lysates were immunoblotted for pro-caspase-1, caspase-1(p10), pro-IL-1 $\beta$ , and IL-1 $\beta$ . (B) The cell culture supernatants were analyzed for secreted IL-1 $\beta$  using ELISA. Values represent the means  $\pm$  SEM (n=3). \*, significantly different from nigericin alone,  $p < 0.05$ . (C) The cell lysates were immunoblotted for ASC. (D) The cells were stained for ASC (green), and the nuclei were stained with 4',6-diamidino-2-phenylindole (DAPI; blue). The arrows indicate ASC speckles. The data are representative of three independent experiments. For immunoblotting results, the cropped blots from full length gels were presented.

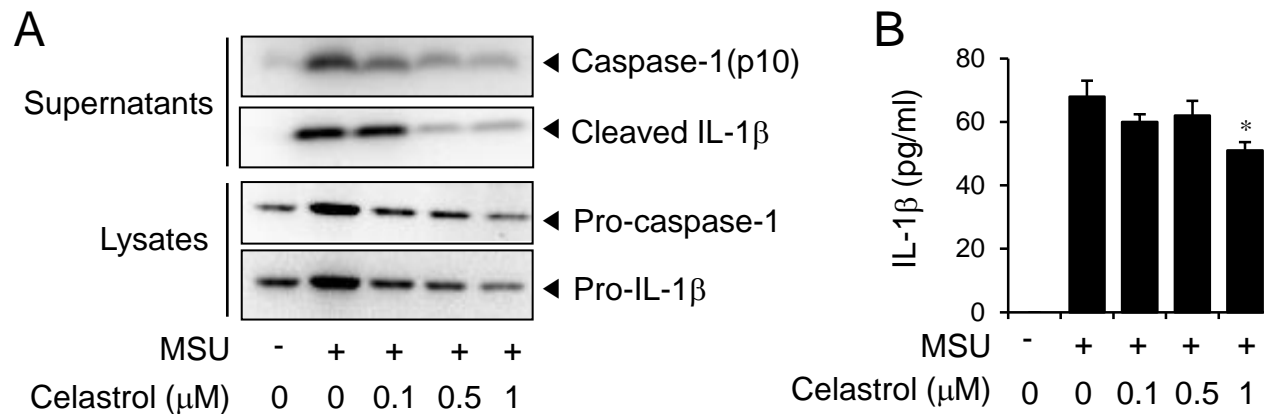

**Supplemental Figure 3. Celastrol suppresses NLRP3 inflammasome activation induced by uric acid crystals in primary macrophages.** Bone marrow-derived macrophages were primed with LPS (500 ng/ml) for 4 hr. The cells were treated with celastrol for 1 hr and then stimulated with monosodium uric acid crystals (MSU, 10 μg/ml) for 6 hr. (A) The cell culture supernatants and cell lysates were immunoblotted for pro-caspase-1, caspase-1(p10), pro-IL-1β, and IL-1β. (B) The cell culture supernatants were analyzed for secreted IL-1β using ELISA. Values represent the means ± SEM (n=3). \*, significantly different from MSU crystals alone,  $p < 0.05$ .

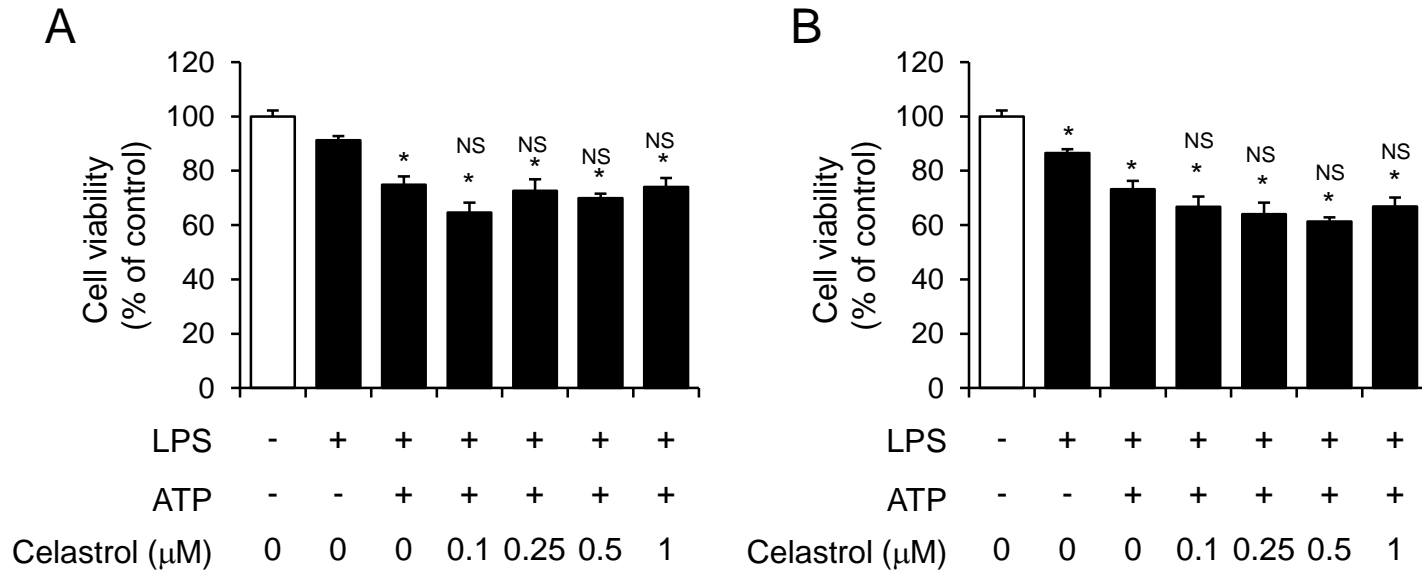

**Supplemental Figure 4. Cell viability.** Bone marrow-derived macrophages were primed with LPS (A: 100 ng/ml, B: 500 ng/ml) for 4 hr. The cells were treated with celastrol for 1 hr and then stimulated with ATP for 2 hr. Cell viability was determined by MTT assay. Values are expressed as the % of control (white bar). Values represent the means  $\pm$  SEM (n=6). Comparisons of data between groups were performed by one-way analysis of variance (ANOVA) followed by Duncan's multiple range test. \*, significantly different from vehicle alone,  $p < 0.05$ . ns, not significant from LPS+ATP.

Lee et al. Figure 5: Full gel pictures

Figure 5B  
Caspase-1(p10)

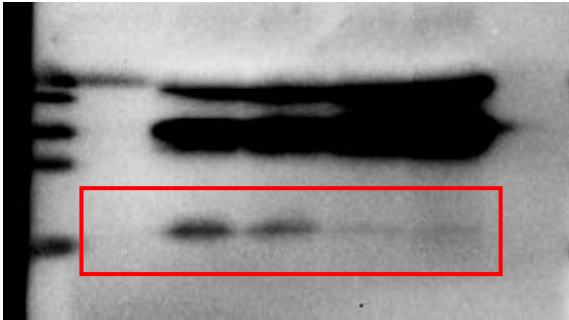

Figure 5B  
Pro-caspase-1

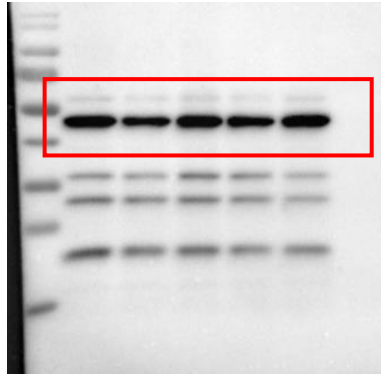

Figure 5D  
ASC oligomer

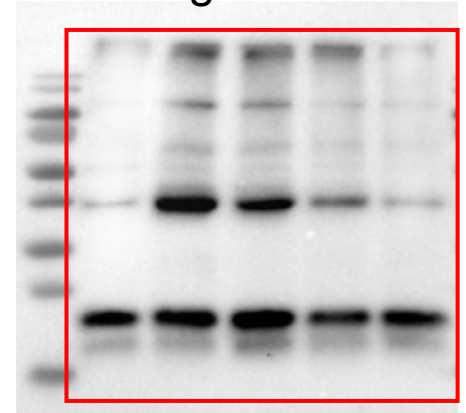

Figure 5B  
Cleaved IL-1 $\beta$

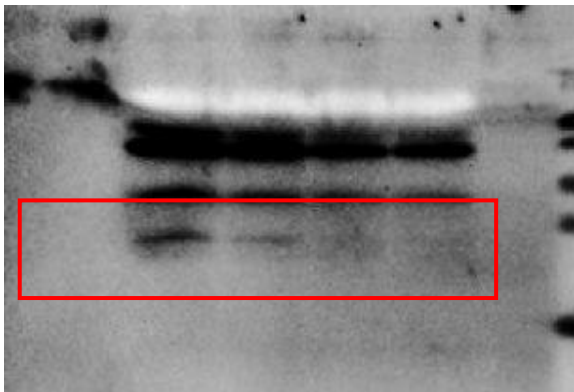

Figure 5B  
Pro-IL-1 $\beta$

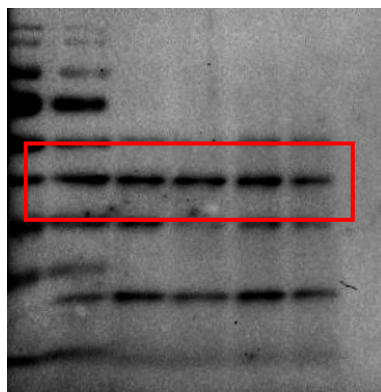

Figure 5D  
ASC

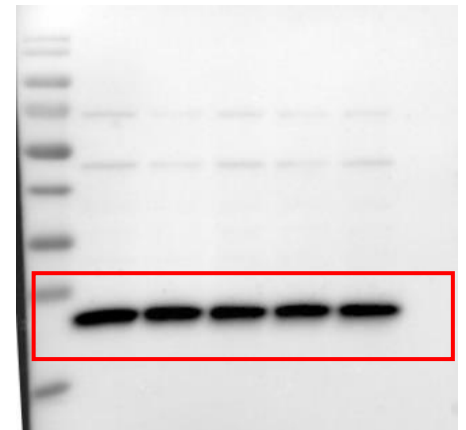

# Lee et al. Supplemental Figure 2: Full gel pictures

S Figure 2A  
Caspase-1(p10)

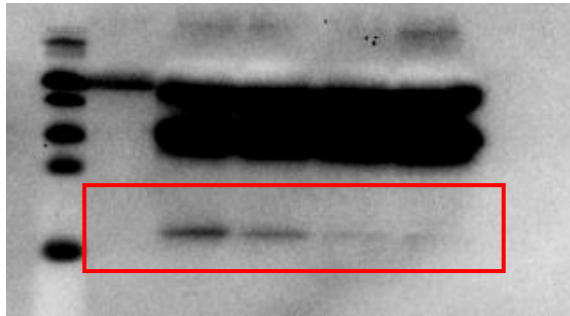

S Figure 2A  
Pro-caspase-1

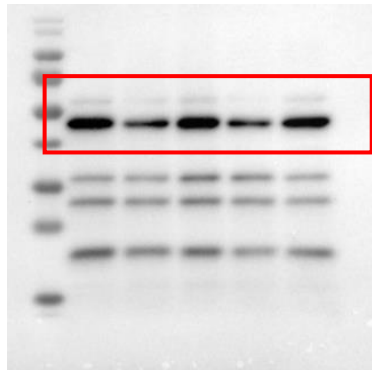

S Figure 2C  
ASC oligomer

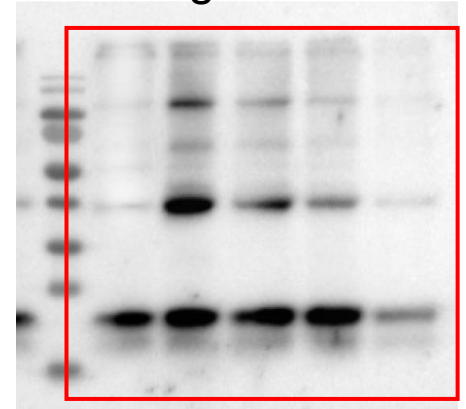

S Figure 2A  
Cleaved IL-1 $\beta$

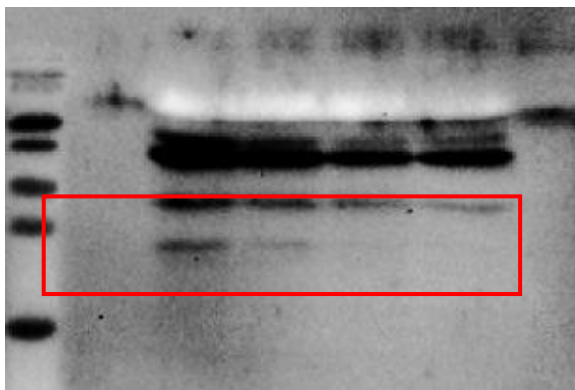

S Figure 2A  
Pro-IL-1 $\beta$

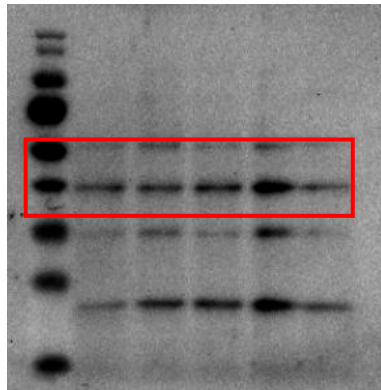

S Figure 2C  
ASC

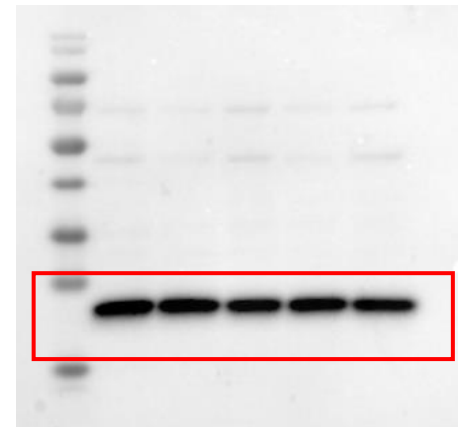

Supplement: Supplementary file 1 — Supplementary Information [file 41598_2019_48794_MOESM1_ESM.pdf]
